# Supplementary material
Source: HighWire-hosted journal article supplement (https://erj.ersjournals.com/content/55/4/2000650)
Supplement: inline-supplementary-material-1 [file inline-supplementary-material-1.pdf]

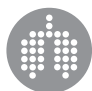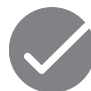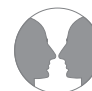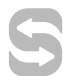

SHAREABLE PDF

# Celebrating World Tuberculosis Day at the time of COVID-19

Riccardo Alagna<sup>1</sup>, Giorgio Besozzi<sup>2,3</sup>, Luigi Ruffo Codecasa<sup>3</sup>, Andrea Gori<sup>4,5</sup>, Giovanni Battista Migliori <sup>6</sup>, Mario Raviglione<sup>7</sup> and Daniela Maria Cirillo <sup>1</sup>

**Affiliations:** <sup>1</sup>IRCCS San Raffaele Scientific Institute, Milan, Italy. <sup>2</sup>StopTB Italia Onlus, Milan, Italy. <sup>3</sup>Regional TB Reference Centre, Istituto Villa Marelli, Ospedale Niguarda, Milan, Italy. <sup>4</sup>Infectious Diseases Unit, IRCCS Ca' Granda Ospedale Maggiore Policlinico Foundation, Milan, Italy. <sup>5</sup>Dept of Pathophysiology and Transplantation, University of Milano, Milan, Italy. <sup>6</sup>Servizio di Epidemiologia Clinica delle Malattie Respiratorie, Istituti Clinici Scientifici Maugeri IRCCS, Tradate, Italy. <sup>7</sup>Global Health Centre, University of Milan, Milan, Italy.

**Correspondence:** Daniela Maria Cirillo, IRCCS San Raffaele Scientific Institute, Via Olgettina 60, Milan 20132, Italy. E-mail: cirillo.daniela@hsr.it

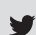

@ERSpublications

TB remains a global health emergency <https://bit.ly/39DqHTb>

**Cite this article as:** Alagna R, Besozzi G, Codecasa LR, *et al.* Celebrating World Tuberculosis Day at the time of COVID-19. *Eur Respir J* 2020; 55: 2000650 [<https://doi.org/10.1183/13993003.00650-2020>].

This single-page version can be shared freely online.

## To the Editor:

World Tuberculosis Day, observed on 24 March each year, is the global call to raise awareness, celebrate successes and remind the world that tuberculosis (TB) is still the number one killer among the infectious causes of death [1]. TB is a preventable and curable disease, and its control is a highly cost-effective health intervention. However, diagnostic delay and inadequate treatment contribute to the severity and mortality of the disease as well as the risk of transmission and development of drug resistance. Despite the fact that TB disproportionately impacts low- and middle-income countries, it does not spare any country in the world, including those in the European Union/European Economic Area, where more than 4000 people still die from the disease every year [2]. Moreover, the high number of multidrug-resistant (MDR)-TB cases in some countries of the World Health Organization (WHO) European Region poses a growing public health threat. Despite the sheer numbers, TB has for too long been overshadowed by HIV and malaria, and currently by the novel coronavirus severe acute respiratory syndrome coronavirus 2 (SARS-CoV-2) responsible for the coronavirus disease 2019 (COVID-19) epidemic.
